# Supplementary material
Source: PubMed Central journal article supplement (PMC4041859)
Supplement: NIHMS560214-supplement-1.pdf [file NIHMS560214-supplement-1.pdf]

**Supplemental Table 1.**  
**Correlation of Clinicopathological Features and ESRP1 Expression in Pancreatic Cancer**

|                               |                  | ESRP1                   |                | P value |
|-------------------------------|------------------|-------------------------|----------------|---------|
|                               |                  | High ( $\geq 5$ , N=65) | Low (<5, N=58) |         |
| <b>Gender</b>                 |                  |                         |                |         |
| F                             |                  | 28                      | 25             | NS      |
| M                             |                  | 37                      | 33             |         |
| <b>Age</b>                    |                  |                         |                |         |
|                               | 66.32 $\pm$ 10.8 |                         |                | NS      |
|                               | <65              | 22                      | 24             |         |
|                               | $\geq 65$        | 43                      | 34             |         |
| <b>UICC classification</b>    |                  |                         |                |         |
| <b>T-primary tumor</b>        |                  |                         |                |         |
| T1                            |                  | 4                       | 2              | NS      |
| T2                            |                  | 3                       | 1              |         |
| T3                            |                  | 57                      | 51             |         |
| T4                            |                  | 1                       | 4              |         |
| <b>N-regional lymph nodes</b> |                  |                         |                |         |
| N0                            |                  | 23                      | 17             | NS      |
| N1                            |                  | 42                      | 41             |         |
| <b>M-distant metastasis</b>   |                  |                         |                |         |
| M0                            |                  | 64                      | 56             | NS      |
| M1                            |                  | 1                       | 2              |         |
| <b>G-histological grading</b> |                  |                         |                |         |
| G1 and G2                     |                  | 60                      | 46             | 0.04    |
| G3                            |                  | 5                       | 12             |         |
| <b>Stage</b>                  |                  |                         |                |         |
| I                             |                  | 6                       | 3              | NS      |
| II                            |                  | 58                      | 52             |         |
| III                           |                  | 1                       | 3              |         |
| IV                            |                  | 0                       | 0              |         |
| <b>Adjuvant Chemotherapy</b>  |                  |                         |                |         |
| +                             |                  | 33                      | 33             |         |
| -                             |                  | 32                      | 25             |         |
