# Supplementary material
Source: PubMed Central journal article supplement (PMC4041859)

**Supplemental Figure 2. Overall Survival and Disease-free Survival of High-ESRP1 and Low-ESRP1 groups In Surgery Only patients**

A Overall survival

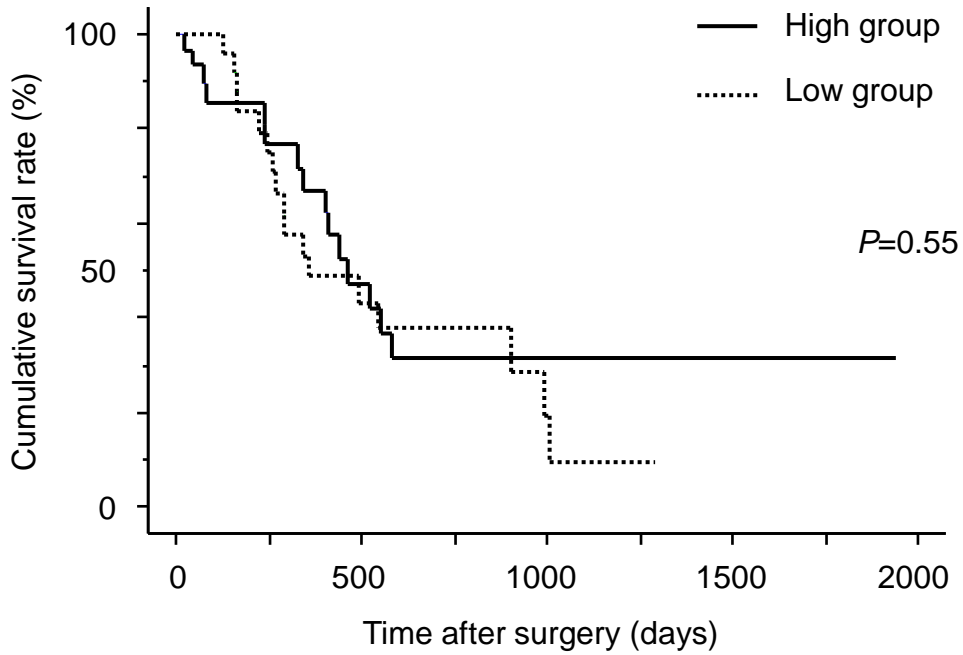

B Disease-free survival

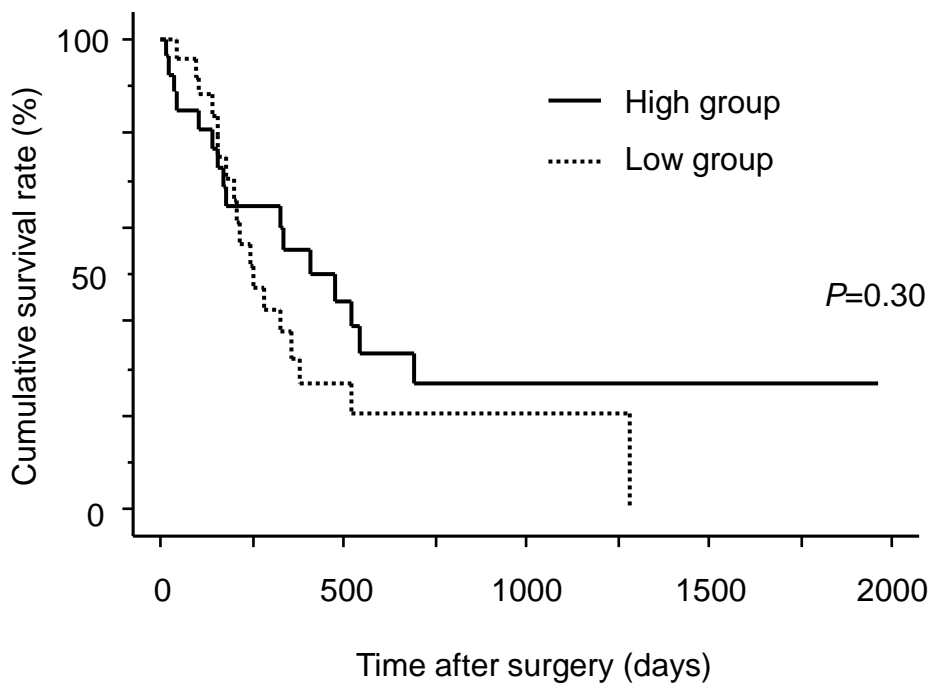

Supplement: NIHMS560214-supplement-2.pdf [file NIHMS560214-supplement-2.pdf]
