# Supplementary material
Source: PubMed Central journal article supplement (PMC4041859)

### Supplemental Figure 3.

### qRT-PCR for ESRP1, FGFR-2 IIIb, and FGFR-2 IIIc mRNA in Multiple Human Pancreatic Cancer Cell Lines

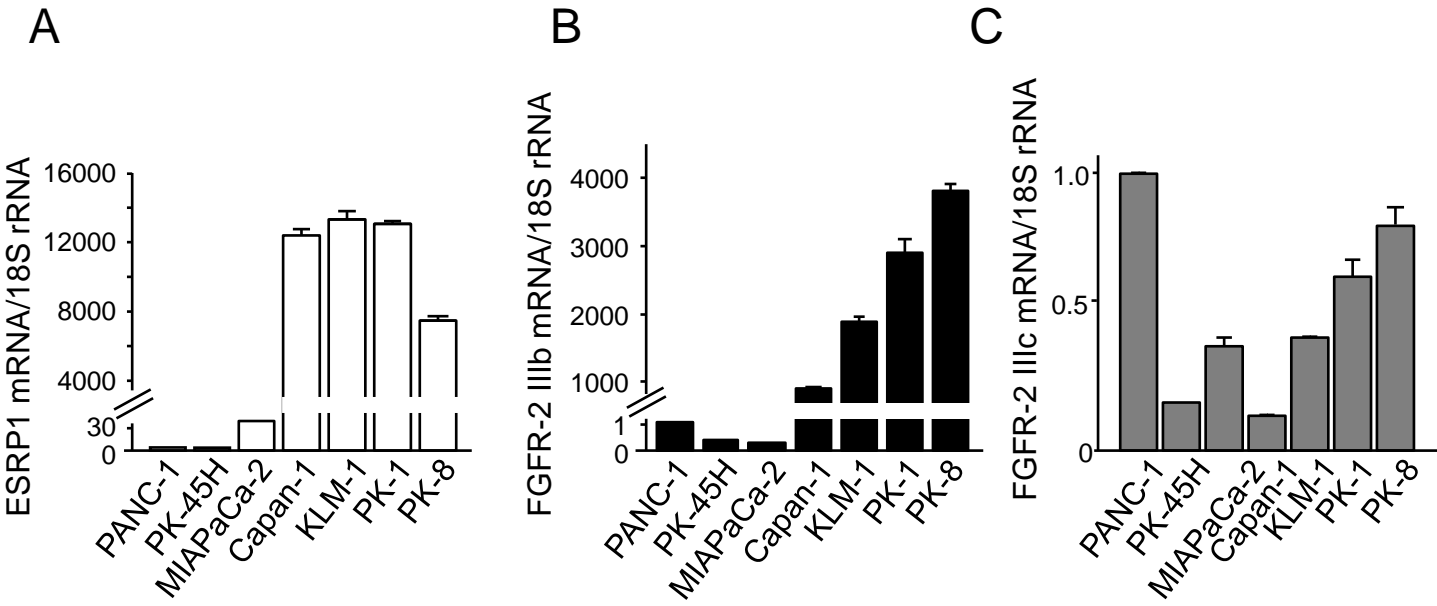

Supplement: NIHMS560214-supplement-3.pdf [file NIHMS560214-supplement-3.pdf]
