# Supplementary material
Source: PubMed Central journal article supplement (PMC4041859)

**Supplemental Figure 9. qPCR of ESRP1 repressed KLM-1 cells targeting of the genes that detected in proteomic analysis**

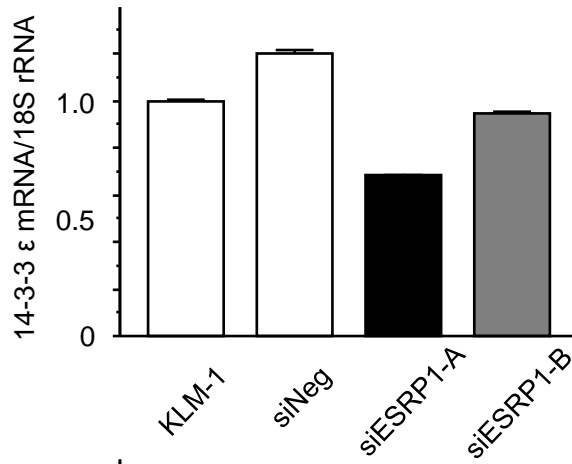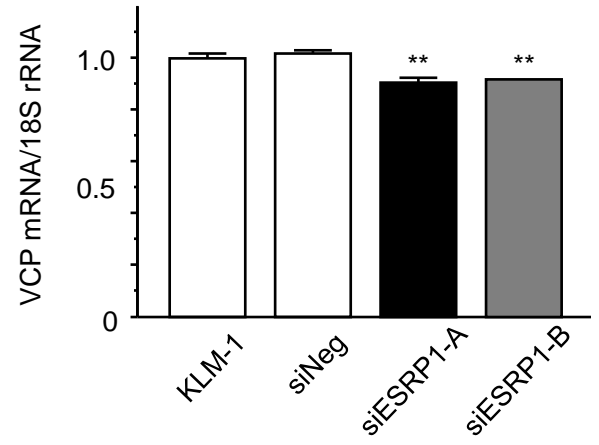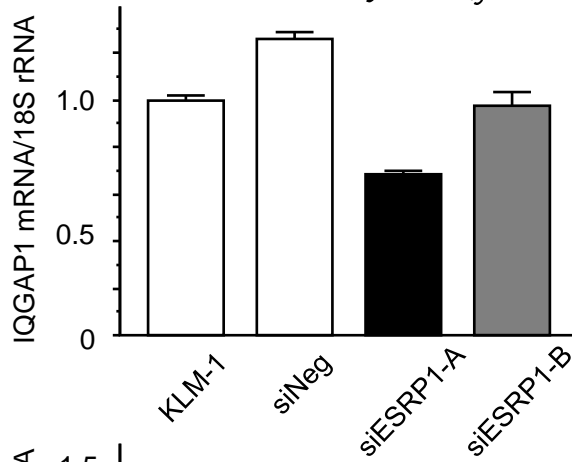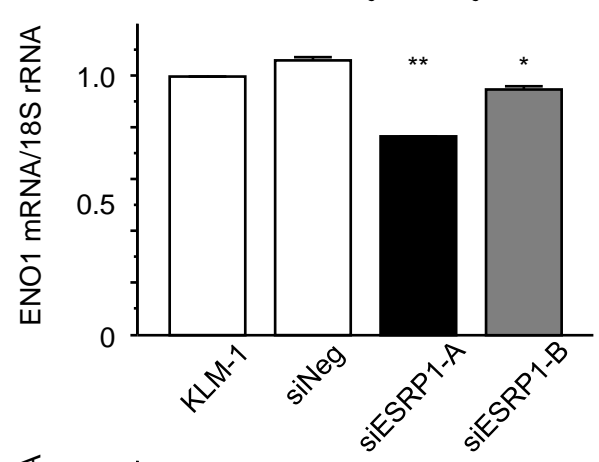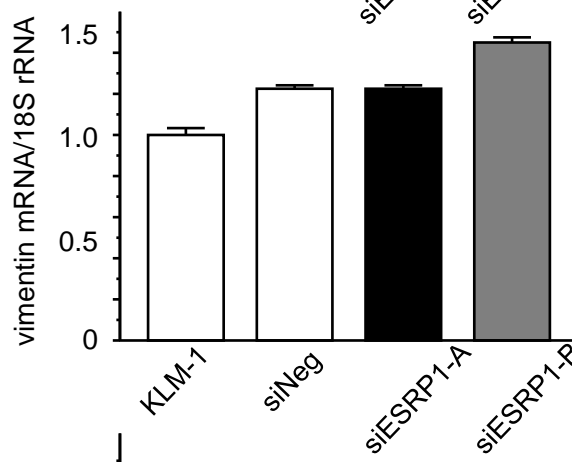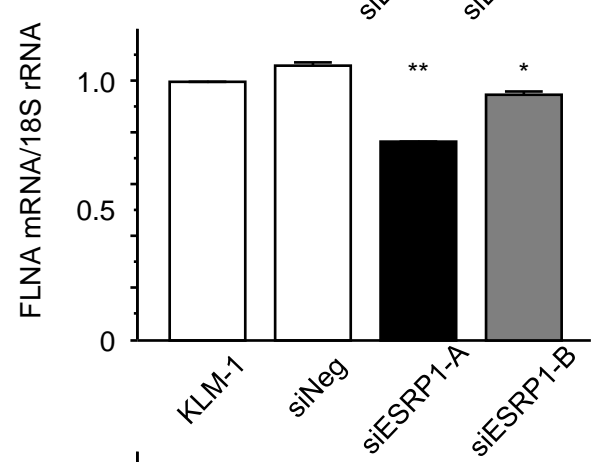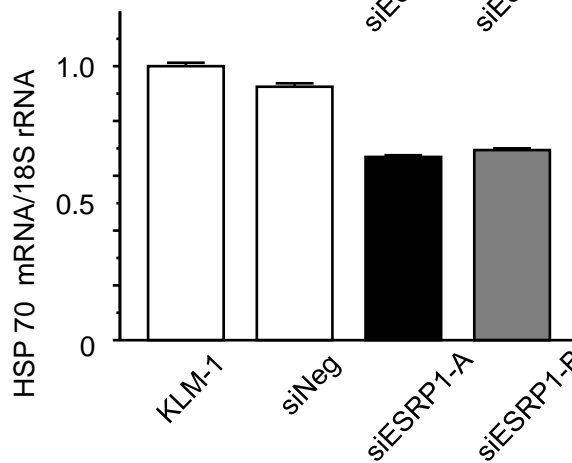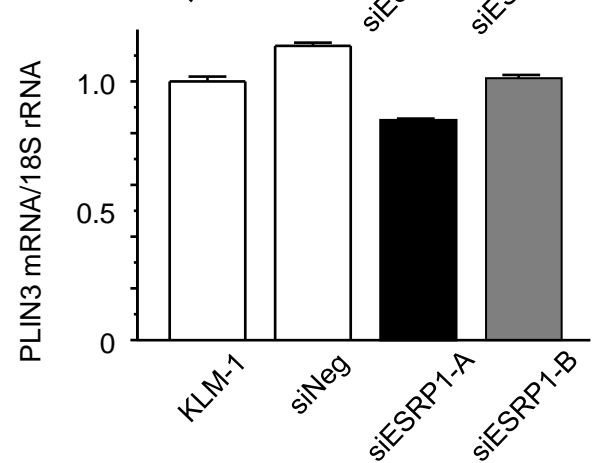

Supplement: NIHMS560214-supplement-10.pdf [file NIHMS560214-supplement-10.pdf]
