# Supplementary material
Source: PubMed Central journal article supplement (PMC4041859)

Supplemental Figure 12. Effects of ESRP1 on FGFR-1, FGFR-3, and CD44 Isoform

A FGFR-1

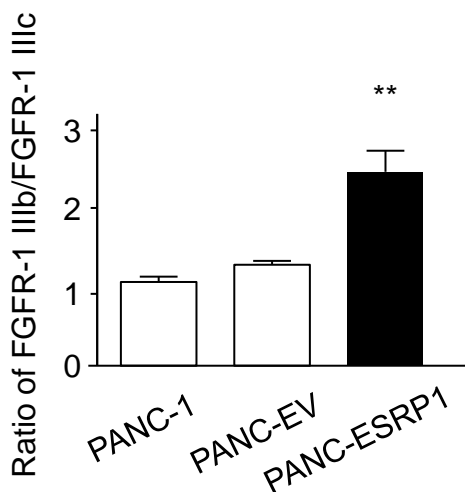

Ratio of FGFR-1 IIIb/FGFR-1 IIIc

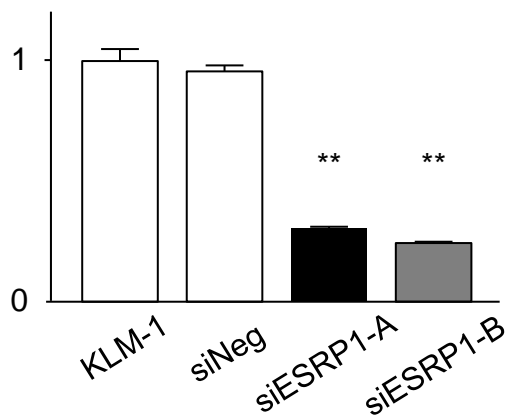

B FGFR-3

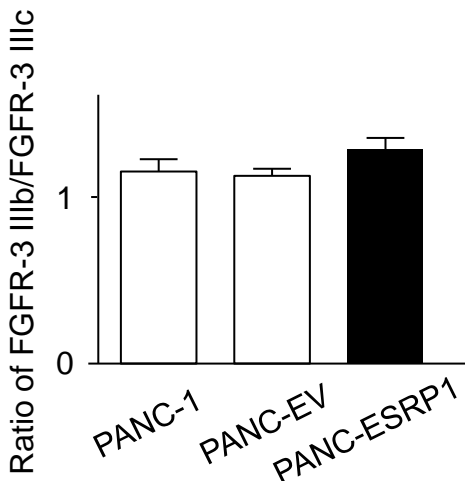

Ratio of FGFR-3 IIIb/FGFR-3 IIIc

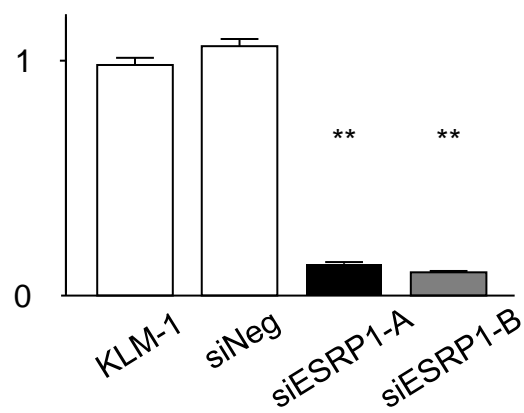

C CD44

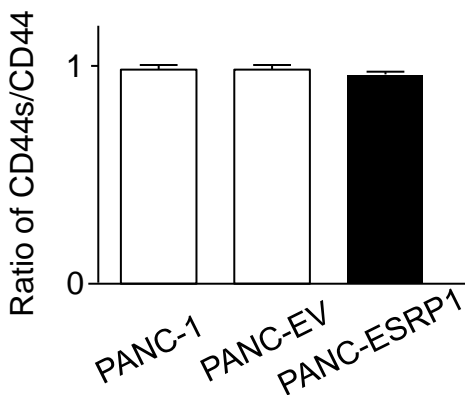

Ratio of CD44s/CD44

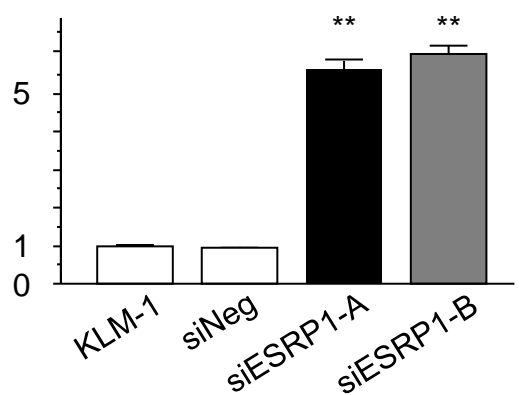

Supplement: NIHMS560214-supplement-13.pdf [file NIHMS560214-supplement-13.pdf]
