# Supplementary material
Source: PubMed Central journal article supplement (PMC4041859)

Supplemental Figure 7. Effects of ESRP1 and FGFR-2 IIIc Silencing in KLM-1 Cells

A

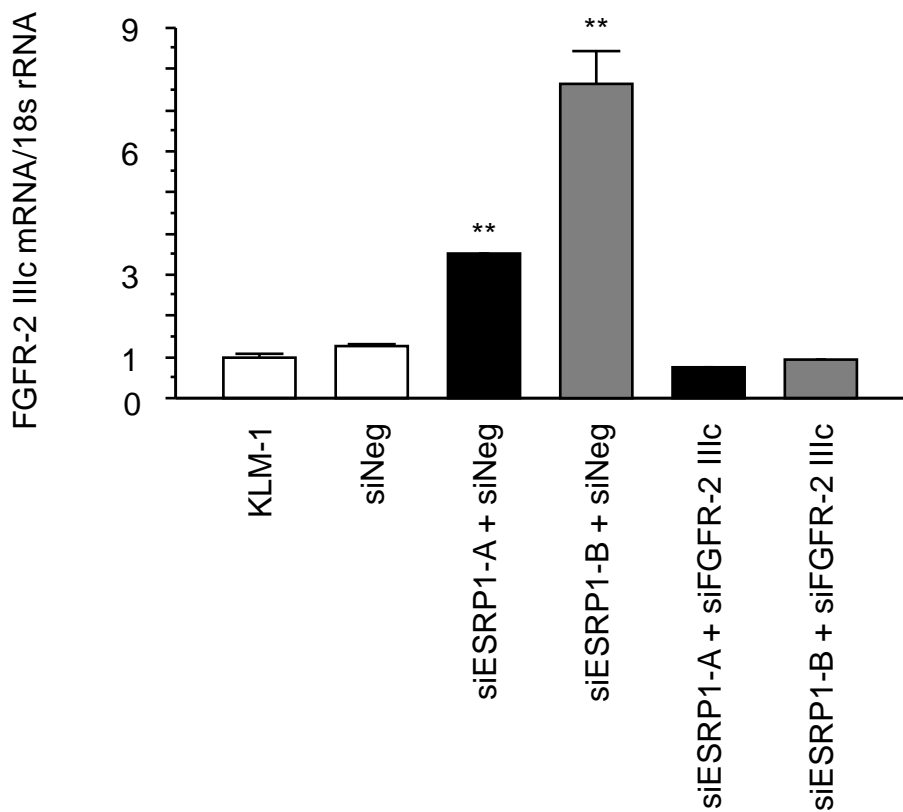

B

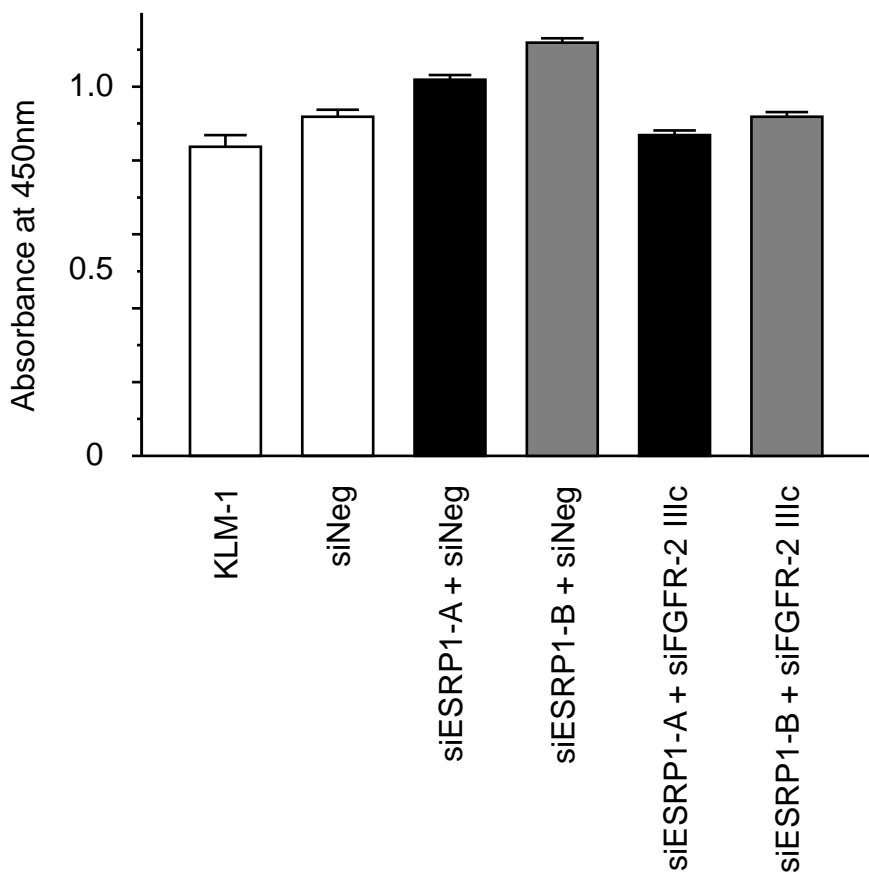

Supplement: NIHMS560214-supplement-7.pdf [file NIHMS560214-supplement-7.pdf]
